# Supplementary material for: The structural and electronic impact on the photophysical and biological properties of a series of CuI and AgI complexes with triphenylphosphine and pyrimidine-type thiones
Source: Royal Society of Chemistry journal article supplement (doi:10.1039/c4nj02203c), 2015-01-01
Supplement: c4nj02203c1.pdf [file c4nj02203c1.pdf]

## New Journal of Chemistry

### Electronic Supplementary Information

#### **Structural and electronic impact on the photophysical and biological properties of a series of Cu<sup>I</sup> and Ag<sup>I</sup> complexes with triphenylphosphine and pyrimidine-type thiones.**

*Panagiotis A. Papanikolaou,\*<sup>a</sup> Anastasios G. Papadopoulos,\*<sup>b</sup> Eleni G. Andreadou,<sup>c</sup> Antonios Hatzidimitriou,<sup>a</sup> Philip J. Cox,<sup>d</sup> Anastasia A. Pantazaki<sup>c</sup> and Paraskevas Aslanidis\*<sup>a</sup>*

<sup>a</sup> Aristotle University of Thessaloniki, Department of Chemistry, Laboratory of Inorganic Chemistry, P.O.B. 135, GR-541 24 Thessaloniki, Greece. Fax: +30 2310 997738; E-mail: [panpapan@chem.auth.gr](mailto:panpapan@chem.auth.gr), [hatzidim@chem.auth.gr](mailto:hatzidim@chem.auth.gr), [aslanidi@chem.auth.gr](mailto:aslanidi@chem.auth.gr)

<sup>b</sup> Aristotle University of Thessaloniki, Department of Chemistry, Laboratory of Applied Quantum Chemistry, P.O.B. 135, GR-541 24 Thessaloniki, Greece. Fax: +30 2310 997738; E-mail: [anastp@chem.auth.gr](mailto:anastp@chem.auth.gr)

<sup>c</sup> Aristotle University of Thessaloniki, Department of Chemistry, Laboratory of Biochemistry, P.O.B. 135, GR-541 24 Thessaloniki, Greece; E-mail: [natasa@chem.auth.gr](mailto:natasa@chem.auth.gr)

<sup>d</sup> School of Pharmacy, The Robert Gordon University, Schoolhill, Aberdeen AB10 1FR, Scotland, United Kingdom. Email: [p.j.cox@rgu.ac.uk](mailto:p.j.cox@rgu.ac.uk)

| <b>Table of ESI Contents</b> |                                                                                                                                                                              | <b>Page</b> |
|------------------------------|------------------------------------------------------------------------------------------------------------------------------------------------------------------------------|-------------|
| Table S1                     | Crystallographic details for the isolated Cu <sup>I</sup> and Ag <sup>I</sup> complexes.                                                                                     | S3          |
| Table S2                     | Energetic and geometrical parameters of the two tautomeric forms of the sulfur-ligands.                                                                                      | S4          |
| Table S3                     | Geometrical parameters of the optimized structures of compounds (7) and (5) and the expected [Ag(PPh <sub>3</sub> ) <sub>2</sub> (pymtH) <sub>2</sub> ] <sup>+</sup> cation. | S5          |
| Table S4                     | Geometrical parameters of the optimized structures of compound (6) and the expected [Ag(PPh <sub>3</sub> ) <sub>2</sub> (dmpymtH) <sub>2</sub> ] <sup>+</sup> cation.        | S6          |
| Table S5                     | Geometrical parameters for the two Cu <sup>I</sup> -pymtH-cations.                                                                                                           | S7          |
| Table S6                     | Geometrical parameters for the two Cu <sup>I</sup> -dmpymtH-cations.                                                                                                         | S8          |
| Table S7                     | NBO atomic charges for the ligands and the studied Ag <sup>I</sup> -cations.                                                                                                 | S9          |
| Table S8                     | Frontier MOs representation for the optimized Cu <sup>I</sup> and Ag <sup>I</sup> complexes.                                                                                 | S10         |
| Figure S1                    | Absorption spectra of Cu <sup>I</sup> and Ag <sup>I</sup> complexes in dichloromethane.                                                                                      | S11         |
| Figure S2                    | Absorption and emission spectra of PPh <sub>3</sub> , pymtH and dmpymtH and dmpmtH in dichloromethane and KBr.                                                               | S12         |
| Figure S3                    | Normalized emission of the complexes and triphenylphosphine in dichloromethane                                                                                               | S13         |
| Figure S4                    | Selected vertical excitations, involved MOs and the simulated absorption spectrum of complex (1).                                                                            | S14         |

**Table S1** Crystallographic details for the isolated Cu<sup>I</sup> and Ag<sup>I</sup> complexes.

| Compound                             | <b>1.CHCl<sub>3</sub></b>                                                                                                                                                                                                                                                                                                                                                     | <b>2.CH<sub>3</sub>OH</b>                                                                                                                 | <b>3.CH<sub>3</sub>OH</b>                                                                                                                 | <b>4.CH<sub>3</sub>OH</b>                                                                                                                                                                                                                                                                                                                                                    | <b>5.CH<sub>3</sub>OH</b>                                                                                                           | <b>6.CH<sub>3</sub>OH</b>                                                                                                           |
|--------------------------------------|-------------------------------------------------------------------------------------------------------------------------------------------------------------------------------------------------------------------------------------------------------------------------------------------------------------------------------------------------------------------------------|-------------------------------------------------------------------------------------------------------------------------------------------|-------------------------------------------------------------------------------------------------------------------------------------------|------------------------------------------------------------------------------------------------------------------------------------------------------------------------------------------------------------------------------------------------------------------------------------------------------------------------------------------------------------------------------|-------------------------------------------------------------------------------------------------------------------------------------|-------------------------------------------------------------------------------------------------------------------------------------|
| Formula                              | C <sub>45</sub> H <sub>39</sub> B <sub>1</sub> Cl <sub>3</sub> Cu <sub>1</sub> F <sub>4</sub> N <sub>4</sub> P <sub>2</sub> S <sub>2</sub>                                                                                                                                                                                                                                    | C <sub>59</sub> H <sub>53</sub> B <sub>1</sub> Cu <sub>1</sub> F <sub>4</sub> N <sub>2</sub> O <sub>1</sub> P <sub>3</sub> S <sub>1</sub> | C <sub>49</sub> H <sub>50</sub> B <sub>1</sub> Cu <sub>1</sub> F <sub>4</sub> N <sub>4</sub> O <sub>1</sub> P <sub>2</sub> S <sub>2</sub> | C <sub>61</sub> H <sub>57</sub> B <sub>1</sub> Cu <sub>1</sub> F <sub>4</sub> N <sub>2</sub> O <sub>1</sub> P <sub>3</sub> S <sub>1</sub>                                                                                                                                                                                                                                    | C <sub>59</sub> H <sub>53</sub> Ag <sub>1</sub> N <sub>3</sub> O <sub>4</sub> P <sub>3</sub> S <sub>1</sub>                         | C <sub>61</sub> H <sub>57</sub> Ag <sub>1</sub> N <sub>3</sub> O <sub>4</sub> P <sub>3</sub> S <sub>1</sub>                         |
| Formula weight                       | 1018.62                                                                                                                                                                                                                                                                                                                                                                       | 1081.42                                                                                                                                   | 987.34                                                                                                                                    | 1109.47                                                                                                                                                                                                                                                                                                                                                                      | 1100.94                                                                                                                             | 1129.00                                                                                                                             |
| Crystal system                       | Triclinic                                                                                                                                                                                                                                                                                                                                                                     | Triclinic                                                                                                                                 | Triclinic                                                                                                                                 | Triclinic                                                                                                                                                                                                                                                                                                                                                                    | Triclinic                                                                                                                           | Triclinic                                                                                                                           |
| Temperature                          | 295 K                                                                                                                                                                                                                                                                                                                                                                         | 295 K                                                                                                                                     | 100(2) K                                                                                                                                  | 295 K                                                                                                                                                                                                                                                                                                                                                                        | 295 K                                                                                                                               | 295 K                                                                                                                               |
| Wavelength                           | 0.71073 Å                                                                                                                                                                                                                                                                                                                                                                     | 0.71073 Å                                                                                                                                 | 0.71073 Å                                                                                                                                 | 0.71073 Å                                                                                                                                                                                                                                                                                                                                                                    | 0.71073 Å                                                                                                                           | 0.71073 Å                                                                                                                           |
| Space group                          | P $\bar{1}$                                                                                                                                                                                                                                                                                                                                                                   | P $\bar{1}$                                                                                                                               | P $\bar{1}$                                                                                                                               | P $\bar{1}$                                                                                                                                                                                                                                                                                                                                                                  | P $\bar{1}$                                                                                                                         | P $\bar{1}$                                                                                                                         |
| Unit cell dimensions                 | a = 13.1382(8) Å<br>b = 14.4016(9) Å<br>c = 14.7271(13) Å<br>$\alpha$ = 118.761(3)°<br>$\beta$ = 102.731(5)°<br>$\gamma$ = 91.598(4)°                                                                                                                                                                                                                                         | a = 12.5375(5) Å<br>b = 13.8679(5) Å<br>c = 16.2676(6) Å<br>$\alpha$ = 91.247(2)°<br>$\beta$ = 108.579(2)°<br>$\gamma$ = 90.431(2)°       | a = 11.8722(8) Å<br>b = 14.4982(10) Å<br>c = 15.3775(11) Å<br>$\alpha$ = 69.538(3)°<br>$\beta$ = 75.633(3)°<br>$\gamma$ = 85.560(4)°      | a = 12.7182(5) Å<br>b = 14.0670(6) Å<br>c = 16.3036(6) Å<br>$\alpha$ = 91.436(2)°<br>$\beta$ = 110.236(2)°<br>$\gamma$ = 90.267(2)°                                                                                                                                                                                                                                          | a = 12.6902(6) Å<br>b = 13.9321(6) Å<br>c = 16.2986(8) Å<br>$\alpha$ = 90.674(3)°<br>$\beta$ = 109.412(3)°<br>$\gamma$ = 91.674(2)° | a = 12.7507(4) Å<br>b = 14.0470(5) Å<br>c = 16.5484(6) Å<br>$\alpha$ = 91.487(2)°<br>$\beta$ = 111.143(2)°<br>$\gamma$ = 92.621(2)° |
| Volume                               | 2353.3(3) Å <sup>3</sup>                                                                                                                                                                                                                                                                                                                                                      | 2680.10(18) Å <sup>3</sup>                                                                                                                | 2402.4(3) Å <sup>3</sup>                                                                                                                  | 2735.65(19) Å <sup>3</sup>                                                                                                                                                                                                                                                                                                                                                   | 2715.9(2) Å <sup>3</sup>                                                                                                            | 2758.68(17) Å <sup>3</sup>                                                                                                          |
| Z                                    | 2                                                                                                                                                                                                                                                                                                                                                                             | 2                                                                                                                                         | 2                                                                                                                                         | 2                                                                                                                                                                                                                                                                                                                                                                            | 2                                                                                                                                   | 2                                                                                                                                   |
| Absorption coefficient ( $\mu$ )     | 0.843 mm <sup>-1</sup>                                                                                                                                                                                                                                                                                                                                                        | 0.592 mm <sup>-1</sup>                                                                                                                    | 0.665 mm <sup>-1</sup>                                                                                                                    | 0.582 mm <sup>-1</sup>                                                                                                                                                                                                                                                                                                                                                       | 0.547 mm <sup>-1</sup>                                                                                                              | 0.540 mm <sup>-1</sup>                                                                                                              |
| Density (calculated)                 | 1.43743 Mg/m <sup>3</sup>                                                                                                                                                                                                                                                                                                                                                     | 1.340 Mg/m <sup>3</sup>                                                                                                                   | 1.365 Mg/m <sup>3</sup>                                                                                                                   | 1.347 Mg/m <sup>3</sup>                                                                                                                                                                                                                                                                                                                                                      | 1.346 Mg/m <sup>3</sup>                                                                                                             | 1.359 Mg/m <sup>3</sup>                                                                                                             |
| Crystal size                         | 0.19 × 0.25 × 0.42 mm                                                                                                                                                                                                                                                                                                                                                         | 0.31 × 0.34 × 0.42 mm                                                                                                                     | 0.16 × 0.14 × 0.06 mm                                                                                                                     | 0.31 × 0.36 × 0.40 mm                                                                                                                                                                                                                                                                                                                                                        | 0.23 × 0.26 × 0.34 mm                                                                                                               | 0.32 × 0.33 × 0.45 mm                                                                                                               |
| Theta range for data collection      | 1.608 to 26.911°                                                                                                                                                                                                                                                                                                                                                              | 1.714 to 30.655°                                                                                                                          | 2.332 to 27.520°                                                                                                                          | 1.332 to 28.903°                                                                                                                                                                                                                                                                                                                                                             | 1.325 to 33.323°                                                                                                                    | 1.321 to 29.798°                                                                                                                    |
| F(000)                               | 1040                                                                                                                                                                                                                                                                                                                                                                          | 1120                                                                                                                                      | 1024                                                                                                                                      | 1152                                                                                                                                                                                                                                                                                                                                                                         | 1136                                                                                                                                | 1168                                                                                                                                |
| Reflections collected                | 67144                                                                                                                                                                                                                                                                                                                                                                         | 54104                                                                                                                                     | 32418                                                                                                                                     | 48373                                                                                                                                                                                                                                                                                                                                                                        | 100427                                                                                                                              | 75227                                                                                                                               |
| Independent reflections              | 10182 [R(int) = 0.044]                                                                                                                                                                                                                                                                                                                                                        | 16311[R(int) = 0.050]                                                                                                                     | 10986 [R(int) = 0.0519]                                                                                                                   | 14219 [R(int) = 0.047]                                                                                                                                                                                                                                                                                                                                                       | 20603[R(int) = 0.042]                                                                                                               | 14469 [R(int) = 0.030]                                                                                                              |
| Completeness up to theta             | 100.0% (theta=26.911°)                                                                                                                                                                                                                                                                                                                                                        | 99.4% (theta=25.137°)                                                                                                                     | 99.8% (theta=25.242°)                                                                                                                     | 99.6% (theta=28.036°)                                                                                                                                                                                                                                                                                                                                                        | 98.4% (theta=32.323°)                                                                                                               | 98.7% (theta=25.030°)                                                                                                               |
| Data/restraints/parameters           | 5762/0/555                                                                                                                                                                                                                                                                                                                                                                    | 8508/0/645                                                                                                                                | 10986/0/583                                                                                                                               | 7702/19/663                                                                                                                                                                                                                                                                                                                                                                  | 9123/0/637                                                                                                                          | 8754/0/658                                                                                                                          |
| Goodness-of-fit on F <sup>2</sup>    | 1.0474                                                                                                                                                                                                                                                                                                                                                                        | 0.9985                                                                                                                                    | 1.061                                                                                                                                     | 1.0661                                                                                                                                                                                                                                                                                                                                                                       | 1.000                                                                                                                               | 0.9991                                                                                                                              |
| Final R indices [ $I > 2\sigma(I)$ ] | R <sub>1</sub> =0.0601, wR <sub>1</sub> =0.0967                                                                                                                                                                                                                                                                                                                               | R <sub>1</sub> =0.0647, wR <sub>1</sub> =0.1154                                                                                           | R <sub>1</sub> =0.0437, wR <sub>1</sub> =0.1177                                                                                           | R <sub>1</sub> =0.0546, wR <sub>1</sub> =0.1073                                                                                                                                                                                                                                                                                                                              | R <sub>1</sub> =0.0383, wR <sub>1</sub> =0.0721                                                                                     | R <sub>1</sub> =0.0523, wR <sub>1</sub> =0.0970                                                                                     |
| R indices (all data)                 | R <sub>2</sub> =0.1468, wR <sub>2</sub> =0.2104                                                                                                                                                                                                                                                                                                                               | R <sub>2</sub> =0.1117, wR <sub>2</sub> =0.1323                                                                                           | R <sub>2</sub> =0.0503, wR <sub>2</sub> =0.1227                                                                                           | R <sub>2</sub> =0.0981, wR <sub>2</sub> =0.1235                                                                                                                                                                                                                                                                                                                              | R <sub>2</sub> =0.0770, wR <sub>2</sub> =0.0952                                                                                     | R <sub>2</sub> =0.0987, wR <sub>2</sub> =0.1148                                                                                     |
| Final weighting scheme               | w = w' × [1 - (ΔF <sub>obs</sub> / 6 × ΔF <sub>est</sub> ) <sup>2</sup> ]<br>w' = [P <sub>0</sub> T <sub>0</sub> '(x) + P <sub>1</sub> T <sub>1</sub> '(x) + ...P <sub>n-1</sub> T <sub>n-1</sub> '(x)] <sup>-1</sup><br>where x = F <sub>calc</sub> <sup>2</sup> /F <sub>calc</sub> <sup>2</sup> <sub>max</sub> and<br>P <sub>0</sub> - P <sub>n-1</sub> = 1.25, 1.25, 0.181 | w = (1/4F <sub>obs</sub> <sup>2</sup> ) × 1                                                                                               | w = 1/[σ <sup>2</sup> (Fo <sup>2</sup> ) + (0.0695P) <sup>2</sup> + 1.28P]<br>where P = (Max(Fo <sup>2</sup> , 0) + 2*Fc <sup>2</sup> )/3 | w = w' × [1 - (ΔF <sub>obs</sub> / 6 × ΔF <sub>est</sub> ) <sup>2</sup> ]<br>w' = [P <sub>0</sub> T <sub>0</sub> '(x) + P <sub>1</sub> T <sub>1</sub> '(x) + ...P <sub>n-1</sub> T <sub>n-1</sub> '(x)] <sup>-1</sup><br>where x = F <sub>calc</sub> <sup>2</sup> /F <sub>calc</sub> <sup>2</sup> <sub>max</sub> and<br>P <sub>0</sub> - P <sub>n-1</sub> = 3.08, 3.73, 1.26 | w = (1/4F <sub>obs</sub> <sup>2</sup> ) × 1                                                                                         | w = (1/4F <sub>obs</sub> <sup>2</sup> ) × 1                                                                                         |
| Largest diff. peak and hole          | 0.63, -0.41 e.Å <sup>-3</sup>                                                                                                                                                                                                                                                                                                                                                 | 0.82, -0.62 e.Å <sup>-3</sup>                                                                                                             | 1.135, -0.527 e.Å <sup>-3</sup>                                                                                                           | 0.86, -0.72 e.Å <sup>-3</sup>                                                                                                                                                                                                                                                                                                                                                | 1.27, -0.51 e.Å <sup>-3</sup>                                                                                                       | 1.51, -0.61 e.Å <sup>-3</sup>                                                                                                       |

**Table S2** Energetic and geometrical parameters in the selected media and visualization of the two tautomeric forms of the sulfur-ligands as they resulted from DFT calculations.

|                                  | <b>pymtH<sub>thione</sub></b>                                                     | <b>pymtH<sub>thiol</sub></b>                                                      | <b>dmpymtH<sub>thione</sub></b>                                                    | <b>dmpymtH<sub>thiol</sub></b>                                                      |
|----------------------------------|-----------------------------------------------------------------------------------|-----------------------------------------------------------------------------------|------------------------------------------------------------------------------------|-------------------------------------------------------------------------------------|
|                                  | 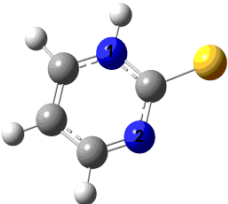 |  |  |  |
| <b>E<sub>opt</sub>, Hartrees</b> | -662.0531                                                                         | -662.0576                                                                         | -740.6039                                                                          | -740.6061                                                                           |
| <b>Vacuum</b>                    | C <sub>ip</sub> -S <sub>thione</sub> = 1.65797 Å                                  | -                                                                                 | C <sub>ip</sub> -S <sub>thione</sub> = 1.66211 Å                                   | -                                                                                   |
|                                  | -                                                                                 | C <sub>ip</sub> -S <sub>thiol</sub> = 1.76431 Å                                   | -                                                                                  | C <sub>ip</sub> -S <sub>thiol</sub> = 1.76804 Å                                     |
|                                  | -                                                                                 | S <sub>thiol</sub> -H = 1.34422 Å                                                 | -                                                                                  | S <sub>thiol</sub> -H = 1.34425 Å                                                   |
|                                  | N <sub>1</sub> -H = 1.01314 Å                                                     | -                                                                                 | N <sub>1</sub> -H = 1.01359 Å                                                      | -                                                                                   |
|                                  | C <sub>ip</sub> -N <sub>1</sub> = 1.39569 Å                                       | C <sub>ip</sub> -N <sub>1</sub> = 1.33427 Å                                       | C <sub>ip</sub> -N <sub>1</sub> = 1.39247 Å                                        | C <sub>ip</sub> -N <sub>1</sub> = 1.33104 Å                                         |
|                                  | C <sub>ip</sub> -N <sub>2</sub> = 1.36851 Å                                       | C <sub>ip</sub> -N <sub>2</sub> = 1.33414 Å                                       | C <sub>ip</sub> -N <sub>2</sub> = 1.36331 Å                                        | C <sub>ip</sub> -N <sub>2</sub> = 1.33054 Å                                         |
| <b>E<sub>opt</sub>, Hartrees</b> | -662.0809                                                                         | -662.0695                                                                         | -740.6282                                                                          | -740.6161                                                                           |
| <b>DCM</b>                       | C <sub>ip</sub> -S <sub>thione</sub> = 1.68796 Å                                  | -                                                                                 | C <sub>ip</sub> -S <sub>thione</sub> = 1.69165 Å                                   | -                                                                                   |
|                                  | -                                                                                 | C <sub>ip</sub> -S <sub>thiol</sub> = 1.76791 Å                                   | -                                                                                  | C <sub>ip</sub> -S <sub>thiol</sub> = 1.77172 Å                                     |
|                                  | -                                                                                 | S <sub>thiol</sub> -H = 1.35905 Å                                                 | -                                                                                  | S <sub>thiol</sub> -H = 1.35871 Å                                                   |
|                                  | N <sub>1</sub> -H = 1.02878 Å                                                     | -                                                                                 | N <sub>1</sub> -H = 1.02732 Å                                                      | -                                                                                   |
|                                  | C <sub>ip</sub> -N <sub>1</sub> = 1.37711 Å                                       | C <sub>ip</sub> -N <sub>1</sub> = 1.33312 Å                                       | C <sub>ip</sub> -N <sub>1</sub> = 1.37647 Å                                        | C <sub>ip</sub> -N <sub>1</sub> = 1.32989 Å                                         |
|                                  | C <sub>ip</sub> -N <sub>2</sub> = 1.35548 Å                                       | C <sub>ip</sub> -N <sub>2</sub> = 1.33455 Å                                       | C <sub>ip</sub> -N <sub>2</sub> = 1.35012 Å                                        | C <sub>ip</sub> -N <sub>2</sub> = 1.33126 Å                                         |
| <b>E<sub>opt</sub>, Hartrees</b> | -662.0846                                                                         | -662.0709                                                                         | -740.6316                                                                          | -740.6174                                                                           |
| <b>MeOH</b>                      | C <sub>ip</sub> -S <sub>thione</sub> = 1.69256 Å                                  | -                                                                                 | C <sub>ip</sub> -S <sub>thione</sub> = 1.69597 Å                                   | -                                                                                   |
|                                  | -                                                                                 | C <sub>ip</sub> -S <sub>thiol</sub> = 1.76886 Å                                   | -                                                                                  | C <sub>ip</sub> -S <sub>thiol</sub> = 1.77251 Å                                     |
|                                  | -                                                                                 | S <sub>thiol</sub> -H = 1.36139 Å                                                 | -                                                                                  | S <sub>thiol</sub> -H = 1.36099 Å                                                   |
|                                  | N <sub>1</sub> -H = 1.03108 Å                                                     | -                                                                                 | N <sub>1</sub> -H = 1.02986 Å                                                      | -                                                                                   |
|                                  | C <sub>ip</sub> -N <sub>1</sub> = 1.37517 Å                                       | C <sub>ip</sub> -N <sub>2</sub> = 1.33288 Å                                       | C <sub>ip</sub> -N <sub>1</sub> = 1.37401 Å                                        | C <sub>ip</sub> -N <sub>1</sub> = 1.32958 Å                                         |
|                                  | C <sub>ip</sub> -N <sub>2</sub> = 1.35355 Å                                       | C <sub>ip</sub> -N <sub>2</sub> = 1.33460 Å                                       | C <sub>ip</sub> -N <sub>2</sub> = 1.34872 Å                                        | C <sub>ip</sub> -N <sub>2</sub> = 1.33140 Å                                         |

**Table S3** Geometrical parameters of the optimized structures for the isolated  $[\text{Ag}(\text{PPh}_3)_2(\text{pymtH})]^+$  (**7**) and  $[\text{Ag}(\text{PPh}_3)_3(\text{pymtH})]^+$  (**5**) and the expected  $[\text{Ag}(\text{PPh}_3)_2(\text{pymtH})_2]^+$  products.

| $[\text{Ag}(\text{PPh}_3)_2(\text{pymtH})]^+$ ( <b>7</b> ) | $[\text{Ag}(\text{PPh}_3)_2(\text{pymtH})_2]^+$ | $[\text{Ag}(\text{PPh}_3)_3(\text{pymtH})]^+$ ( <b>5</b> ) |
|------------------------------------------------------------|-------------------------------------------------|------------------------------------------------------------|
|                                                            |                                                 |                                                            |
| Ag-S = 2.59843 Å                                           | Ag-S <sub>1</sub> = 2.69371 Å                   | Ag-S = 2.78708 Å                                           |
| Ag-P <sub>1</sub> = 2.45015 Å                              | Ag-S <sub>2</sub> = 2.72814 Å                   | Ag-P <sub>2</sub> = 2.53540 Å                              |
| Ag-P <sub>2</sub> = 2.46475 Å                              | Ag-P <sub>2</sub> = 2.49245 Å                   | Ag-P <sub>1</sub> = 2.57620 Å                              |
| Ag-N <sub>2</sub> = 3.26057 Å                              | Ag-P <sub>1</sub> = 2.48423 Å                   | Ag-P <sub>3</sub> = 2.54077 Å                              |
| C <sub>ip</sub> -S = 1.68331 Å                             | C <sub>ip</sub> -S <sub>1</sub> = 1.70525 Å     | C <sub>ip</sub> -S = 1.68567 Å                             |
| N <sub>1</sub> -H = 1.01461 Å                              | C <sub>81</sub> -S <sub>2</sub> = 1.70822 Å     | C <sub>ip</sub> -N <sub>1</sub> = 1.37976 Å                |
| C <sub>ip</sub> -N <sub>1</sub> = 1.37969 Å                | C <sub>ip</sub> -N <sub>3</sub> = 1.37063 Å     | C <sub>ip</sub> -N <sub>2</sub> = 1.35470 Å                |
| C <sub>ip</sub> -N <sub>2</sub> = 1.35299 Å                | C <sub>ip</sub> -N <sub>4</sub> = 1.34515 Å     | S-Ag-P <sub>1</sub> = 103.30°                              |
| S-Ag-P <sub>1</sub> = 114.40°                              | C <sub>ip</sub> -N <sub>2</sub> = 1.37103 Å     | S-Ag-P <sub>2</sub> = 93.00°                               |
| S-Ag-P <sub>2</sub> = 113.09°                              | C <sub>ip</sub> -N <sub>1</sub> = 1.34379 Å     | S-Ag-P <sub>3</sub> = 98.64°                               |
| P <sub>1</sub> -Ag-P <sub>2</sub> = 132.47°                | S <sub>2</sub> -Ag-P <sub>2</sub> = 110.67°     | P <sub>2</sub> -Ag-P <sub>3</sub> = 120.44°                |
|                                                            | S <sub>1</sub> -Ag-P <sub>2</sub> = 104.14°     | P <sub>1</sub> -Ag-P <sub>3</sub> = 120.60°                |
|                                                            | S <sub>2</sub> -Ag-P <sub>1</sub> = 103.71°     | P <sub>2</sub> -Ag-P <sub>1</sub> = 112.71°                |
|                                                            | S <sub>1</sub> -Ag-P <sub>1</sub> = 113.17°     |                                                            |
|                                                            | P <sub>2</sub> -Ag-P <sub>1</sub> = 125.51°     |                                                            |

**Table S4** Geometrical parameters of the optimized structures for the isolated  $[\text{Ag}(\text{PPh}_3)_3(\text{dmpymtH})]^+$  (**6**) and the expected  $[\text{Ag}(\text{PPh}_3)_2(\text{dmpymtH})_2]^+$  products resulted from DFT calculations.

| $[\text{Ag}(\text{PPh}_3)_2(\text{dmpymtH})_2]^+$ | $[\text{Ag}(\text{PPh}_3)_3(\text{dmpymtH})]^+$ ( <b>6</b> ) |
|---------------------------------------------------|--------------------------------------------------------------|
|                                                   |                                                              |
| Ag-S <sub>1</sub> = 2.69500 Å                     | Ag-S = 2.66402 Å                                             |
| Ag-S <sub>2</sub> = 2.69016 Å                     | Ag-P <sub>1</sub> = 2.56414 Å                                |
| Ag-P <sub>1</sub> = 2.50405 Å                     | Ag-P <sub>3</sub> = 2.55924 Å                                |
| Ag-P <sub>2</sub> = 2.50106 Å                     | Ag-P <sub>2</sub> = 2.54357 Å                                |
| C <sub>ip</sub> -S <sub>1</sub> = 1.71567 Å       | C <sub>ip</sub> -S = 1.69118 Å                               |
| C <sub>ip</sub> -S <sub>2</sub> = 1.71206 Å       | C <sub>ip</sub> -N <sub>2</sub> = 1.37695 Å                  |
| C <sub>ip</sub> -N <sub>3</sub> = 1.36829 Å       | C <sub>ip</sub> -N <sub>1</sub> = 1.34763 Å                  |
| C <sub>ip</sub> -N <sub>4</sub> = 1.33826 Å       | S-Ag-P <sub>3</sub> = 106.30°                                |
| C <sub>ip</sub> -N <sub>1</sub> = 1.33402 Å       | S-Ag-P <sub>1</sub> = 95.83°                                 |
| C <sub>ip</sub> -N <sub>2</sub> = 1.37085 Å       | S-Ag-P <sub>2</sub> = 110.59°                                |
| S <sub>1</sub> -Ag-P <sub>1</sub> = 112.27°       | P <sub>1</sub> -Ag-P <sub>2</sub> = 113.29°                  |
| S <sub>2</sub> -Ag-P <sub>1</sub> = 107.95°       | P <sub>3</sub> -Ag-P <sub>2</sub> = 117.97°                  |
| S <sub>1</sub> -Ag-P <sub>2</sub> = 107.39°       | P <sub>1</sub> -Ag-P <sub>3</sub> = 110.38°                  |
| S <sub>2</sub> -Ag-P <sub>2</sub> = 111.06°       |                                                              |
| P <sub>1</sub> -Ag-P <sub>2</sub> = 119.37°       |                                                              |

**Table S5** Geometrical parameters for the two Cu<sup>I</sup>-pymtH-cations resulted from DFT calculations.

| $[\text{Cu}(\text{PPh}_3)_2(\text{pymtH})_2]^+ \text{ (1)}$ | $[\text{Cu}(\text{PPh}_3)_3(\text{pymtH})]^+ \text{ (2)}$ |
|-------------------------------------------------------------|-----------------------------------------------------------|
|                                                             |                                                           |
| Cu-S <sub>1</sub> = 2.41485 Å                               | Cu-S = 2.52914 Å                                          |
| Cu-S <sub>2</sub> = 2.42846 Å                               | Cu-P <sub>2</sub> = 2.36001 Å                             |
| Cu-P <sub>2</sub> = 2.3381 Å                                | Cu-P <sub>3</sub> = 2.37649 Å                             |
| Cu-P <sub>1</sub> = 2.32289 Å                               | Cu-P <sub>1</sub> = 2.42174 Å                             |
| C <sub>ip</sub> -S <sub>1</sub> = 1.70402 Å                 | C <sub>ip</sub> -S = 1.69243 Å                            |
| C <sub>ip</sub> -S <sub>2</sub> = 1.70895 Å                 | C <sub>ip</sub> -N <sub>2</sub> = 1.35194 Å               |
| C <sub>ip</sub> -N <sub>3</sub> = 1.36960 Å                 | C <sub>ip</sub> -N <sub>1</sub> = 1.37706 Å               |
| C <sub>ip</sub> -N <sub>4</sub> = 1.34322 Å                 | S-Cu-P <sub>3</sub> = 101.32°                             |
| C <sub>ip</sub> -N <sub>1</sub> = 1.34557 Å                 | S-Cu-P <sub>1</sub> = 103.99°                             |
| C <sub>ip</sub> -N <sub>2</sub> = 1.36917 Å                 | S-Cu-P <sub>2</sub> = 95.25°                              |
| S <sub>1</sub> -Cu-P <sub>1</sub> = 110.21°                 | P <sub>1</sub> -Cu-P <sub>2</sub> = 112.12°               |
| S <sub>2</sub> -Cu-P <sub>1</sub> = 102.81°                 | P <sub>3</sub> -Cu-S <sub>75</sub> = 101.32°              |
| S <sub>1</sub> -Cu-P <sub>2</sub> = 104.41°                 | P <sub>1</sub> -Cu-S <sub>75</sub> = 103.99°              |
| S <sub>2</sub> -Cu-P <sub>2</sub> = 112.20°                 |                                                           |
| P <sub>1</sub> -Cu-S <sub>75</sub> = 110.21°                |                                                           |
| P <sub>2</sub> -Cu-S <sub>80</sub> = 112.20°                |                                                           |

**Table S6** Geometrical parameters for the two Cu<sup>I</sup>-dmpymtH-cations resulted from DFT calculations.

| [Cu(PPh <sub>3</sub> ) <sub>2</sub> (dmpymtH) <sub>2</sub> ] <sup>+</sup> (3)     | [Cu(PPh <sub>3</sub> ) <sub>3</sub> (dmpymtH)] <sup>+</sup> (4)                    |
|-----------------------------------------------------------------------------------|------------------------------------------------------------------------------------|
| 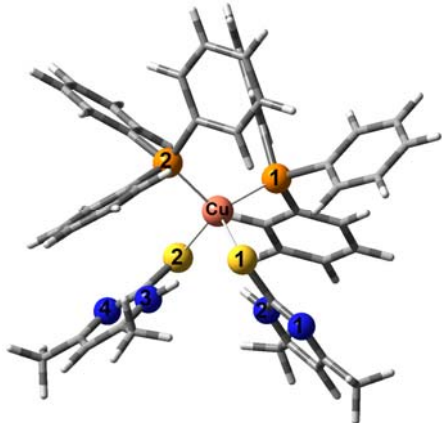 |  |
| Cu-S <sub>2</sub> = 2.41485 Å                                                     | Cu-S = 2.41280 Å                                                                   |
| Cu-S <sub>1</sub> = 2.42846 Å                                                     | Cu-P <sub>2</sub> = 2.39437 Å                                                      |
| Cu-P <sub>1</sub> = 2.3381 Å                                                      | Cu-P <sub>3</sub> = 2.37665 Å                                                      |
| Cu-P <sub>2</sub> = 2.32289 Å                                                     | Cu-P <sub>1</sub> = 2.40110 Å                                                      |
| C <sub>ip</sub> -S <sub>2</sub> = 1.70402 Å                                       | C <sub>ip</sub> -S = 1.69490 Å                                                     |
| C <sub>ip</sub> -S <sub>1</sub> = 1.70895 Å                                       | C <sub>ip</sub> -N <sub>2</sub> = 1.37445 Å                                        |
| C <sub>ip</sub> -N <sub>1</sub> = 1.33656 Å                                       | C <sub>ip</sub> -N <sub>1</sub> = 1.34652 Å                                        |
| C <sub>ip</sub> -N <sub>2</sub> = 1.36791 Å                                       | S-Cu-P <sub>3</sub> = 111.76°                                                      |
| C <sub>ip</sub> -N <sub>3</sub> = 1.36619 Å                                       | S-Cu-P <sub>1</sub> = 106.98°                                                      |
| C <sub>ip</sub> -N <sub>2</sub> = 1.33914 Å                                       | S-Cu-P <sub>2</sub> = 95.22°                                                       |
| S <sub>1</sub> -Cu-P <sub>1</sub> = 113.55°                                       | P <sub>1</sub> -Cu-P <sub>2</sub> = 108.97°                                        |
| S <sub>2</sub> -Cu-P <sub>1</sub> = 106.60°                                       | P <sub>3</sub> -Cu-S = 111.76°                                                     |
| S <sub>1</sub> -Cu-P <sub>2</sub> = 103.94°                                       | P <sub>2</sub> -Cu-S = 95.22°                                                      |
| S <sub>2</sub> -Cu-P <sub>2</sub> = 109.66°                                       | P <sub>1</sub> -Cu-S = 106.98°                                                     |
| P <sub>2</sub> -Cu-S <sub>2</sub> = 110.21°                                       |                                                                                    |
| P <sub>1</sub> -Cu-S <sub>1</sub> = 112.20°                                       |                                                                                    |



**Table S7** NBO atomic charges for the ligands and the studied Ag<sup>I</sup>-cations.

|                                                                           | $q_S$          | $\Delta q_S^a$ | $q_{Npyr}$ | $\Delta q_{Npyr}$ | $q_P$                   | $\Delta q_P^b$          | $q_{Ag}$ |
|---------------------------------------------------------------------------|----------------|----------------|------------|-------------------|-------------------------|-------------------------|----------|
| pymtH                                                                     | -0.16          | -              | -0.46      | -                 | -                       | -                       | -        |
| dmpymtH                                                                   | -0.18          | -              | -0.49      | -                 | -                       | -                       | -        |
| PPh <sub>3</sub>                                                          | -              | -              | -          | -                 | +0.91                   | -                       | -        |
| [Ag(PPh <sub>3</sub> ) <sub>2</sub> (pymtH)] <sup>+</sup> ( <b>7</b> )    | -0.13          | +0.03          | -0.48      | -0.02             | +0.95                   | +0.04                   | +0.29    |
| [Ag(PPh <sub>3</sub> ) <sub>2</sub> (pymtH) <sub>2</sub> ] <sup>+</sup>   | -0.17          | -0.01          | -0.46      | +0.00             | +0.98                   | +0.07                   | +0.019   |
| [Ag(PPh <sub>3</sub> ) <sub>3</sub> (pymtH)] <sup>+</sup> ( <b>5</b> )    | -0.17          | -0.01          | -0.49      | -0.03             | +0.94<br>+0.95<br>+0.95 | +0.03<br>+0.04<br>+0.04 | +0.20    |
| [Ag(PPh <sub>3</sub> ) <sub>2</sub> (dmpymtH) <sub>2</sub> ] <sup>+</sup> | -0.20<br>-0.19 | -0.02<br>-0.01 | -0.49      | 0.00              | +0.98                   | +0.07                   | +0.03    |
| [Ag(PPh <sub>3</sub> ) <sub>3</sub> (dmpymtH)] <sup>+</sup> ( <b>6</b> )  | -0.11          | +0.07          | -0.49      | +0.00             | +0.97<br>+0.97<br>+0.98 | +0.06<br>+0.06<br>+0.07 | +0.06    |

<sup>a</sup>  $\Delta q_S$  (=  $q_{S\text{coordinated thione}} - q_{S\text{free thione}}$ ) refers to the difference in the nbo charge of the sulfur atom between the coordinated and the respective free thione.

<sup>b</sup>  $\Delta q_P$  (=  $q_{P\text{coordinated phosphine}} - q_{P\text{free phosphine}}$ ) refers to the difference in the nbo charge of the phosphorus atom between the coordinated PPh<sub>3</sub> and the free phosphine.

**Table S8** Frontier MOs representation (0.02 isovalue) for the optimized Cu<sup>I</sup> and Ag<sup>I</sup> complexes.

| Complex cation                                                                | HOMO-1                                                                              | HOMO                                                                                | LUMO                                                                                 | LUMO+1                                                                                |
|-------------------------------------------------------------------------------|-------------------------------------------------------------------------------------|-------------------------------------------------------------------------------------|--------------------------------------------------------------------------------------|---------------------------------------------------------------------------------------|
| [Cu(PPh <sub>3</sub> ) <sub>2</sub> (pymtH) <sub>2</sub> ] <sup>+</sup> (1)   | 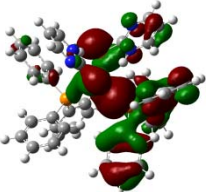   |    |    |    |
| [Cu(PPh <sub>3</sub> ) <sub>3</sub> (pymtH)] <sup>+</sup> (2)                 |    |    |    |    |
| [Cu(PPh <sub>3</sub> ) <sub>2</sub> (dmpymtH) <sub>2</sub> ] <sup>+</sup> (3) |    |    |    |    |
| [Cu(PPh <sub>3</sub> ) <sub>3</sub> (dmpymtH)] <sup>+</sup> (4)               |   |   |   |   |
| [Ag(PPh <sub>3</sub> ) <sub>3</sub> (pymtH)] <sup>+</sup> (5)                 |  |  |  |  |
| [Ag(PPh <sub>3</sub> ) <sub>3</sub> (dmpymtH)] <sup>+</sup> (6)               |  |  |  |  |
| [Ag(PPh <sub>3</sub> ) <sub>2</sub> (pymtH)] <sup>+</sup> (7)                 |  |  |  |  |
| [Ag(PPh <sub>3</sub> ) <sub>2</sub> (pymtH) <sub>2</sub> ] <sup>+</sup>       |  |  |  |  |
| [Ag(PPh <sub>3</sub> ) <sub>2</sub> (dmpymtH) <sub>2</sub> ] <sup>+</sup>     |  |  |  |  |

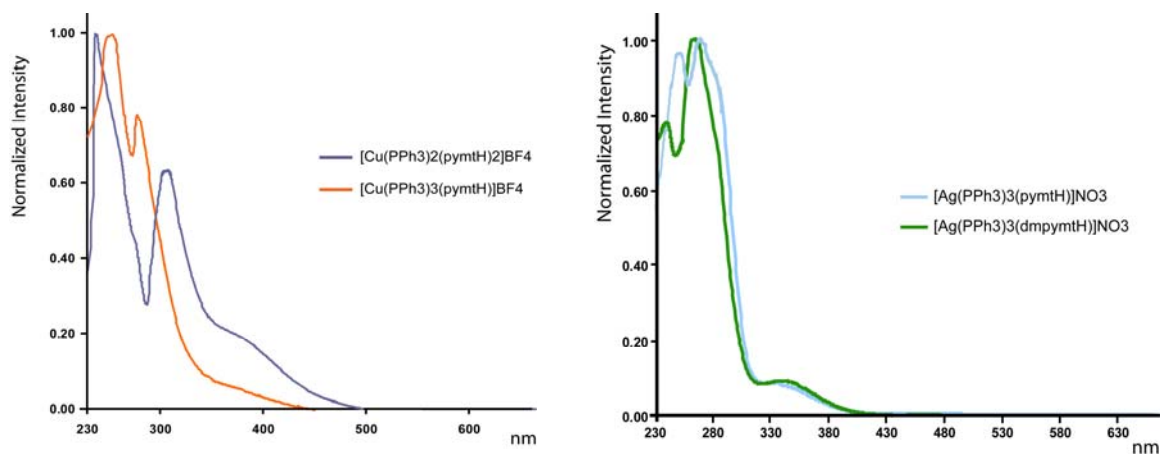

**Figure S1.** Normalized absorption spectra of  $\text{Cu}^{\text{I}}$ -pymtH complexes (left diagram) and two of the isolated  $\text{Ag}^{\text{I}}$ -complexes (right diagram) in dichloromethane.

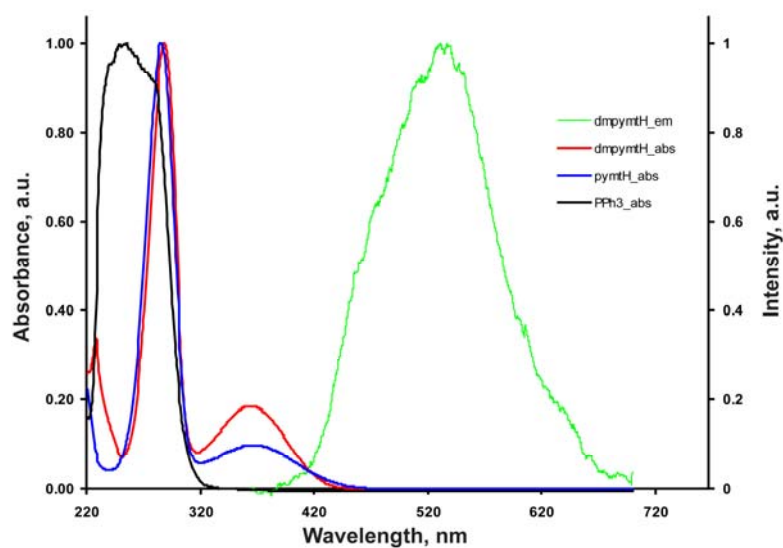

**Figure S2.** Normalized absorption intensity of  $\text{PPh}_3$ , pymtH and dmpymtH in dichloromethane and normalized emission intensity of dmpymtH in dichloromethane ( $\lambda_{\text{exc}} = 350 \text{ nm}$ ).

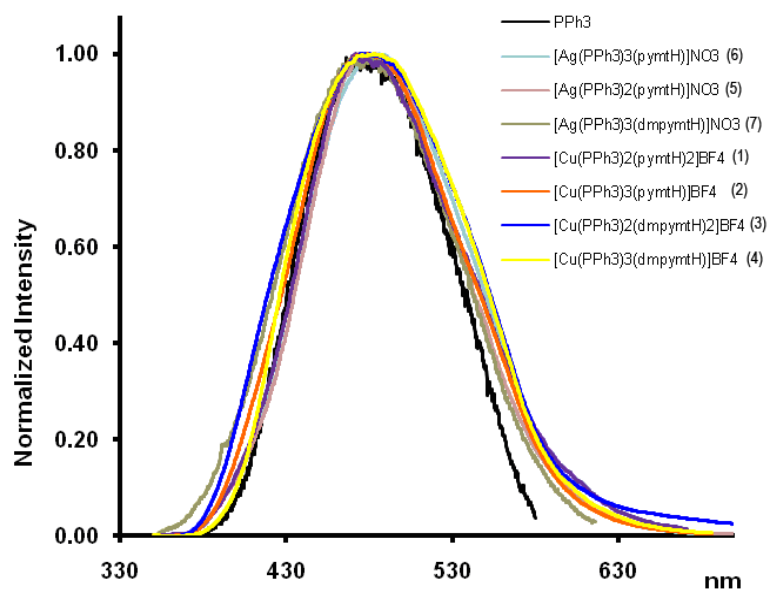

**Figure S3.** Normalized emission of the Cu(I) and Ag(I) complexes under study in dichloromethane after photoexcitation at 300 nm. Emission of PPh<sub>3</sub> in dichloromethane (black line,  $\lambda_{\text{exc}} = 300$  nm) is also given for comparison reasons.

| Excitation                                                                          | E/eV  | $\lambda$ /nm | Orbital Nature                                                  | Character    | OS, f  |
|-------------------------------------------------------------------------------------|-------|---------------|-----------------------------------------------------------------|--------------|--------|
| HOMO $\rightarrow$ LUMO                                                             | 2.776 | 447           | $3d_{Cu}/\pi_{PPh_3} \rightarrow \pi^*_{(pymtH)}$               | MLCT/LLCT    | 0.0014 |
| HOMO $\rightarrow$ LUMO+1, HOMO-1 $\rightarrow$ LUMO                                | 2.842 | 436           | $3d_{Cu}/\pi_{PPh_3} \rightarrow \pi^*_{(pymtH)}$               | MLCT/LLCT    | 0.0266 |
| HOMO $\rightarrow$ LUMO+1, HOMO-1 $\rightarrow$ LUMO+1, HOMO-2 $\rightarrow$ LUMO+1 | 2.872 | 432           | $3d_{Cu}/\pi_{PPh_3} \rightarrow \pi^*_{(pymtH)}$               | MLCT/LLCT    | 0.0005 |
| HOMO-2 $\rightarrow$ LUMO                                                           | 2.930 | 423           | $3d_{Cu} \rightarrow \pi^*_{(pymtH)}$                           | MLCT         | 0.0021 |
| HOMO-1 $\rightarrow$ LUMO+1, HOMO-2 $\rightarrow$ LUMO+1                            | 3.021 | 411           | $3d_{Cu}/\pi_{PPh_3} \rightarrow \pi^*_{(pymtH)}$               | MLCT/LLCT    | 0.0014 |
| HOMO-2 $\rightarrow$ LUMO+2                                                         | 3.675 | 337           | $3d_{Cu} \rightarrow \pi^*_{(pymtH)}$                           | MLCT         | 0.0227 |
| HOMO-7 $\rightarrow$ LUMO, HOMO-1 $\rightarrow$ LUMO+3                              | 3.832 | 323           | $\pi_{PPh_3} \rightarrow \pi^*_{(pymtH)}$                       | LLCT         | 0.0225 |
| HOMO $\rightarrow$ LUMO+4                                                           | 4.367 | 284           | $3d_{Cu}/\pi_{PPh_3} \rightarrow \pi^*_{(PPh_3)}$               | MLCT/IL      | 0.0968 |
| HOMO-3 $\rightarrow$ LUMO+3                                                         | 4.536 | 273           | $3d_{Cu}/\pi_{PPh_3}/\pi_{(pymtH)} \rightarrow \pi^*_{(pymtH)}$ | MLCT/LLCT/IL | 0.0777 |

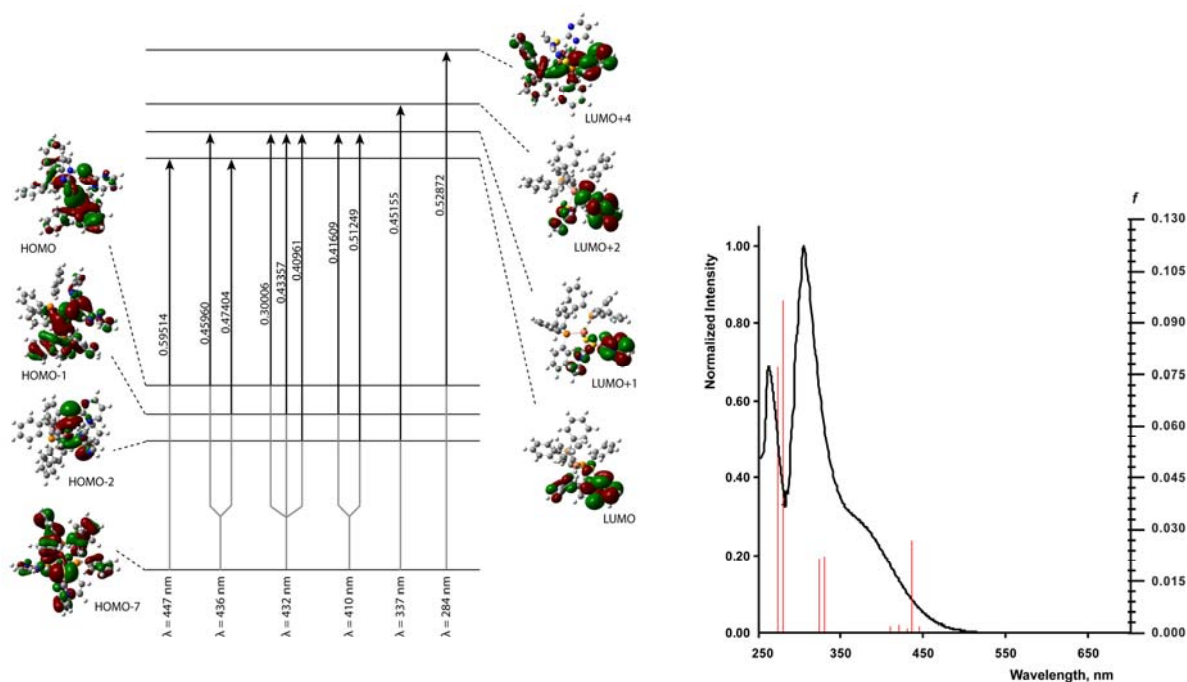

**Figure S4** Up: Selected vertical excitations in the absorption spectra of  $[\text{Cu}(\text{PPh}_3)_2(\text{pymtH})_2]^+$  (**1**) calculated at the PBE1PBE/6-31G(d),SDD level of theory. Down left: Representation of MOs of  $[\text{Cu}(\text{PPh}_3)_2(\text{pymtH})_2]^+$  (**1**) involved in selected singlet-singlet transitions along with the calculated excitation wavelengths and CI coefficients. Down right: Experimental absorption spectrum of  $[\text{Cu}(\text{PPh}_3)_2(\text{pymtH})_2]^+$  (**1**) along with the calculated excitation energies appearing as vertical lines.
